# Supplementary material for: Identification of CD8+ T Cell Related Biomarkers in Ovarian Cancer
Source: PubMed Central journal article supplement (PMC9196910; doi:10.3389/fgene.2022.860161), 2022-05-27
Supplement: Image14.pdf [file Image14.pdf]

# Appendix

## Figure legends of supplementary figures.

**Supplementary Figure S1** | The relative abundance of 22 distinct immune cell types in the (A) TCGA-OV cohort and GSE140082 cohort.

**Supplementary Figure S2** | Weighted gene co-expression network analysis in the TCGA-OV cohort. (A) Sample dendrogram with trait heatmap. (B) Dendrogram of differentially expressed genes clustered based on different metrics.

**Supplementary Figure S3** | Weighted gene co-expression network analysis in the GSE140082 cohort. (A) Sample dendrogram with trait heatmap. (B) Analysis of the scale-free fit index and the average connectivity of various soft threshold power. (C) Dendrogram of differentially expressed genes clustered based on different metrics.

**Supplementary Figure S4** | Consensus maps showed the correlation profiling of OC patients derived from 2 to 10 sub-consensuses.

**Supplementary Figure S5** | Verification of the subclass distribution. (A) PCA and (B) t-SNE analyses supported the classification of OC into two subtypes.

**Supplementary Figure S6** | The violin plots showed (A) the immune score, (B) the stromal score, (C) the ESTIMATE score, and (D) the tumor purity in different OC subtypes.

**Supplementary Figure S7** | The boxplots showed the gene expression (log) of 148 immunomodulators in different OC subtypes: (A) chemokine; (B) receptor; (C) MHC; (D) immunostimulatory; (E) immunoinhibitory.

**Supplementary Figure S8** | Functional enrichment analyses of OC clusters. (A) GO and (B) KEGG pathway analyses of DEGs between CD8<sup>+</sup> T cell-based molecular subtypes. Oncological signatures were significantly enriched in (C) Cluster 1 and (D) Cluster 2 identified by gene set enrichment analysis (GSEA).

**Supplementary Figure S9** | The survival curves of the remaining 9 genes in the TCGA-OV cohort. (A) BATF2; (B) CCR7; (C) CD3G; (D) CD40LG; (E) CLEC5A; (F) CXCL9; (G) ETV7; (H) HLA\_DOB; (I) HLA\_F.

**Supplementary Figure S10** | The survival curves of the remaining 9 genes in the GSE140082 cohort. (A) BATF2; (B) CCR7; (C) CD3G; (D) CD40LG; (E) CLEC5A; (F) CXCL9; (G) ETV7; (H) HLA\_DOB; (I) HLA\_F.

**Supplementary Figure S11** | The survival curves of the remaining 9 genes in the GSE32062 cohort. (A) BATF2; (B) CCR7; (C) CD3G; (D) CD40LG; (E) CLEC5A; (F) CXCL9; (G) ETV7; (H) HLA\_DOB; (I) HLA\_F.

**Supplementary Figure S12** | The lollipop charts showed the correlation between the immune infiltrates and (A) CD38 and (B) CXCL13 expression in the TCGA-OV cohort.
